# Supplementary material for: Comprehensive Metabolite Profiling of Four Different Beans Fermented by Aspergillus oryzae
Source: MDPI journal article supplement (doi:10.3390/molecules27227917), 2022-11-16
Supplement: s1 [file s1]

# Comprehensive Metabolite Profiling of Four Different Beans Fermented by *Aspergillus Oryzae*

Yeon Hee Lee <sup>1</sup>, Na-Rae Lee <sup>2,\*</sup> and Choong Hwan Lee <sup>1,2,\*</sup>

<sup>1</sup> Department of Bioscience and Biotechnology, Konkuk University, Seoul 05029, Korea

<sup>2</sup> Research Institute for Bioactive-Metabolome Network, Konkuk University, Seoul 05029, Korea

\* Correspondence: michelle3690@gmail.com (N.R.L.); chlee123@konkuk.ac.kr (C.H.L.); Tel.: +82-2-2049-6177 (C.H.L.)

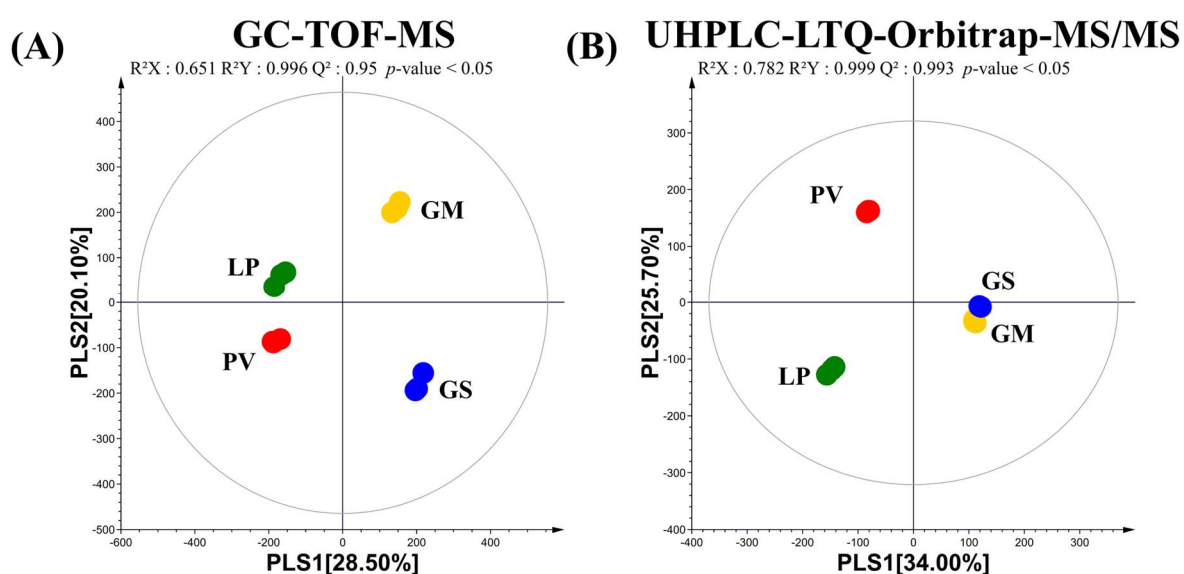

**Figure S1.** Partial least-square discriminant analysis of the metabolites in the four beans before fermenting. The methods included GC-TOF-MS (A) and UHPLC-LTQ-Orbitrap-MS/MS (B). (●) (GM): *Glycine max*, (●) (GS): *Glycine soja*, (●) (PV): *Phaseolus vulgaris*, (●) (LP): *Lablab purpureus*.

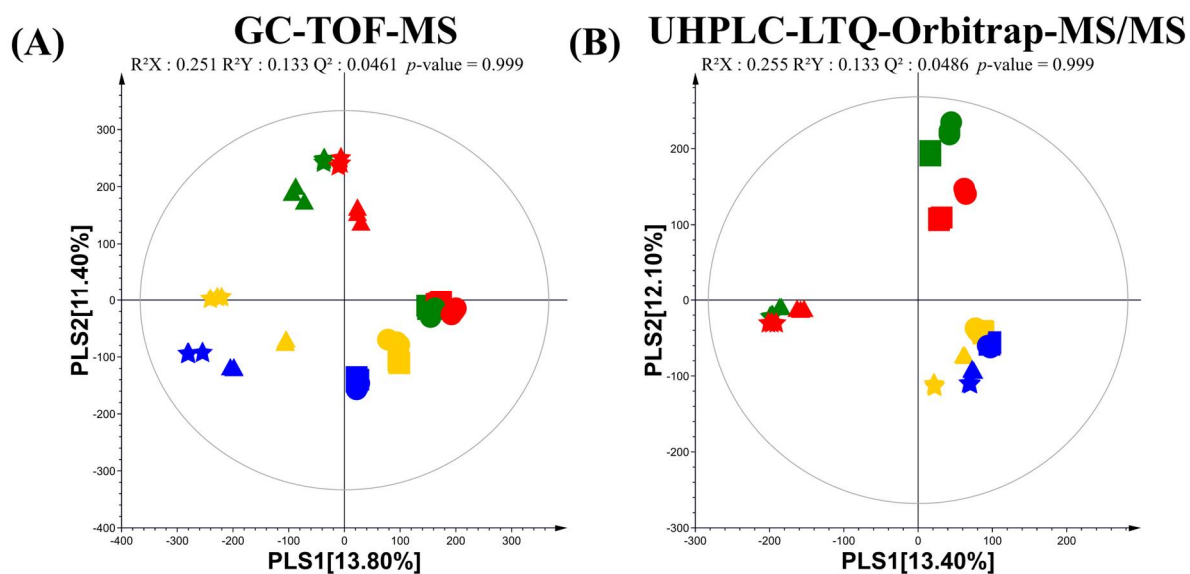

**Figure S2.** Partial least-square discriminant analysis of the metabolites in the four beans that were fermented with *Aspergillus oryzae*. The methods included GC-TOF-MS (A) and UHPLC-LTQ-Orbitrap-MS/MS (B). GM: *Glycine max*, GS: *Glycine soja*, PV: *Phaseolus vulgaris*, LP: *Lablab purpureus*, 0D: 0 day after fermentation, 1D: 1 day after fermentation, 2D: 2 days after fermentation, 3D: 3 days after fermentation

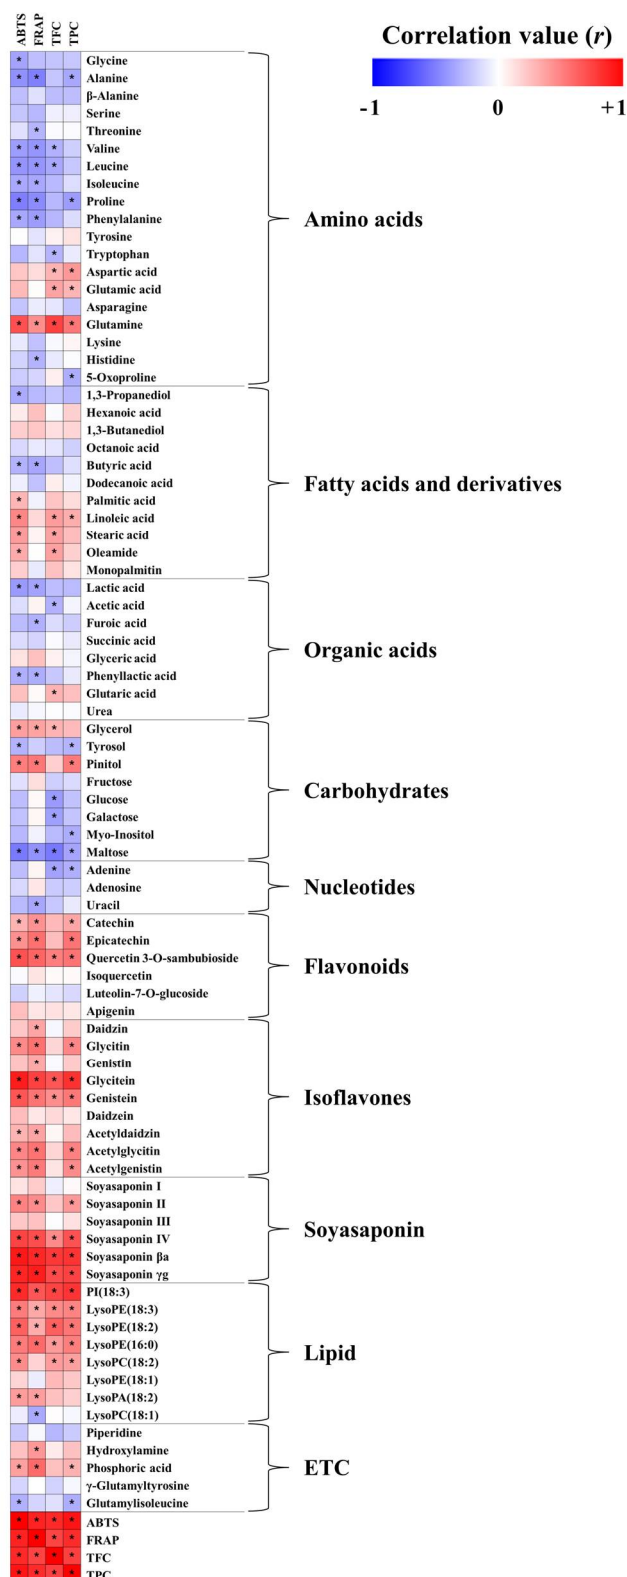

**Figure S3.** Correlation map between the metabolite levels and antioxidant activities. Each metabolite is identified as a significantly different metabolite through PLS-DA. Each square indicates Pearson's correlation coefficient values ( $r$ ) of a pair of metabolites and assayed activities. The blue color represents a negative correlation ( $-1 < r < 0$ ) and red color represents a positive correlation ( $0 < r < 1$ ). Asterisks indicate significant difference ( $p < 0.05$ ).

**Table S1.** Discriminative metabolites in the four beans from the PLS-DA model of the GC-TOF-MS data.

| No.                                  | Tentative identification | RT(min) | VIP 1 | VIP 2 | Unique Mass(m/z) | Mass Fragment pattern(m/z)              | p-value | ID     |
|--------------------------------------|--------------------------|---------|-------|-------|------------------|-----------------------------------------|---------|--------|
| <i>Amino acids</i>                   |                          |         |       |       |                  |                                         |         |        |
| 1                                    | Alanine                  | 5.76    | 1.08  | 0.78  | 116              | 116 73 75 117 103 74 59 190 100 118     | 0.00    | STD/MS |
| 2                                    | Valine                   | 6.98    | 1.76  | 1.24  | 144              | 144 73 218 145 147 100 75 74 59 146     | 0.00    | STD/MS |
| 3                                    | Leucine                  | 7.53    | 1.76  | 1.25  | 158              | 158 159 102 100 160 232 260 142 86 115  | 0.00    | STD    |
| 4                                    | Isoleucine               | 7.75    | 1.45  | 1.33  | 158              | 158 73 218 159 100 74 160 232 219 59 86 | 0.00    | STD/MS |
| 5                                    | Proline                  | 7.81    | 1.86  | 1.32  | 142              | 142 73 143 147 216 144 74 59 66 72      | 0.00    | STD/MS |
| 6                                    | Glycine                  | 7.89    | 1.14  | 0.91  | 174              | 174 90 86 175 146 100 248 176 130 59    | 0.00    | STD/MS |
| 7                                    | Serine                   | 8.38    | 0.95  | 1.25  | 204              | 73 204 218 147 100 205 75 219 74 188    | 0.00    | STD/MS |
| 8                                    | Threonine                | 8.63    | 1.80  | 1.31  | 117              | 73 117 218 219 101 147 57 75 291 74     | 0.00    | STD/MS |
| 9                                    | β-Alanine                | 8.97    | 0.29  | 1.24  | 174              | 174 248 86 290 175 249 133 59 130 250   | 0.00    | MS     |
| 10                                   | Aspartic acid            | 9.76    | 1.02  | 1.27  | 232              | 73 232 100 147 75 218 74 233 202 188    | 0.00    | STD/MS |
| 11                                   | 5-Oxoproline             | 9.83    | 1.84  | 1.33  | 156              | 156 73 147 75 84 157 230 258 74 158     | 0.00    | MS     |
| 12                                   | Phenylalanine            | 10.02   | 1.77  | 1.25  | 120              | 120 146 75 91 130 121 74 103 77 65      | 0.00    | STD    |
| 13                                   | Glutamic acid            | 10.54   | 1.04  | 1.47  | 246              | 73 246 128 147 75 156 247 84 74 230     | 0.00    | STD    |
| 14                                   | Asparagine               | 10.96   | 1.34  | 0.98  | 116              | 73 116 75 132 231 147 74 141 188 100    | 0.00    | STD/MS |
| 15                                   | Glutamine                | 11.71   | 1.31  | 0.97  | 245              | 156 155 75 245 157 128 131 203 114 145  | 0.03    | STD    |
| 16                                   | Lysine                   | 12.73   | 0.03  | 1.54  | 317              | 73 174 317 156 128 175 230 59 318 147   | 0.00    | MS     |
| 17                                   | Histidine                | 12.77   | 0.58  | 0.77  | 154              | 154 254 155 100 255 156 153 82 356 256  | 0.00    | STD    |
| 18                                   | Tyrosine                 | 12.87   | 0.84  | 1.46  | 218              | 218 219 100 280 220 179 281 132 180 354 | 0.00    | STD/MS |
| <i>Fatty acids and derivatives</i>   |                          |         |       |       |                  |                                         |         |        |
| 19                                   | 1,3-Propanediol          | 5.21    | 0.43  | 1.41  | 115              | 147 73 130 115 66 148 59 177 131 149    | 0.00    | MS     |
| 20                                   | Hexanoic acid            | 5.39    | 1.85  | 1.31  | 173              | 75 73 173 117 131 132 74 76 55 61       | 0.00    | MS     |
| 21                                   | 1,3-Butanediol           | 5.51    | 1.20  | 1.08  | 117              | 73 147 117 75 129 103 148 133 74        | 0.05    | MS     |
| 22                                   | Octanoic acid            | 7.40    | 1.27  | 1.41  | 201              | 201 117 55 129 69 202 70 67 99 143      | 0.00    | MS     |
| 23                                   | Butyric acid             | 8.99    | 1.19  | 1.38  | 233              | 73 233 143 75 117 147 71 234 145 144    | 0.00    | MS     |
| 24                                   | Dodecanoic acid          | 10.73   | 1.16  | 1.37  | 257              | 75 117 129 55 132 57 131 145 257 76     | 0.00    | MS     |
| 25                                   | Palmitic acid            | 13.44   | 1.19  | 1.16  | 173              | 73 117 75 132 313 129 55 145 57 69      | 0.00    | STD/MS |
| 26                                   | Linoleic acid            | 14.47   | 1.49  | 1.19  | 337              | 73 75 55 67 81 117 95 129 69 54         | 0.00    | STD/MS |
| 27                                   | Stearic acid             | 14.61   | 0.47  | 0.98  | 341              | 117 341 145 202 119 356 301 203 95      | 0.00    | STD/MS |
| 28                                   | Oleamide                 | 15.62   | 1.08  | 0.81  | 131              | 75 131 73 144 116 128 55 54 115 145     | 0.00    | MS     |
| 29                                   | Monopalmitin             | 16.50   | 0.17  | 1.51  | 371              | 73 147 371 57 55 129 75 71 117 103      | 0.00    | MS     |
| <i>Organic acids</i>                 |                          |         |       |       |                  |                                         |         |        |
| 30                                   | Lactic acid              | 5.29    | 1.11  | 0.85  | 117              | 73 147 117 191 66 148 75 190 74 59      | 0.00    | STD/MS |
| 31                                   | Acetic acid              | 5.45    | 1.84  | 1.31  | 66               | 73 147 66 148 75 177 205 74 133 149     | 0.00    | MS     |
| 32                                   | Furoic acid              | 5.45    | 0.97  | 1.40  | 125              | 125 95 169 126 184 170 67 96 97 85      | 0.00    | MS     |
| 33                                   | Succinic acid            | 7.90    | 0.37  | 1.11  | 247              | 147 75 247 148 73 55 56 149 129 172     | 0.00    | STD/MS |
| 34                                   | Glyceric acid            | 8.10    | 1.33  | 0.95  | 292              | 73 147 189 103 292 133 75 117 102 74    | 0.00    | STD/MS |
| 35                                   | Glutaric acid            | 10.42   | 0.05  | 0.42  | 247              | 73 147 75 247 115 231 199 273 74 109    | 0.00    | MS     |
| 36                                   | Urea                     | 7.16    | 1.26  | 1.27  | 171              | 171 147 73 189 99 172 100 74 148 173    | 0.00    | STD/MS |
| <i>Carbohydrates and derivatives</i> |                          |         |       |       |                  |                                         |         |        |
| 37                                   | Glycerol                 | 7.55    | 1.22  | 1.31  | 205              | 73 147 205 117 103 133 206 218 148 204  | 0.00    | MS     |
| 38                                   | Pinitol                  | 12.22   | 0.80  | 1.38  | 217              | 73 147 217 260 133 191 318 159 247 129  | 0.00    | MS     |
| 39                                   | Fructose                 | 12.48   | 1.00  | 0.75  | 307              | 73 103 217 147 307 74 133 75 117 218    | 0.00    | STD/MS |
| 40                                   | Glucose                  | 12.67   | 1.15  | 1.40  | 205              | 73 205 319 147 160 103 217 320 117 206  | 0.00    | STD/MS |
| 41                                   | Galactose                | 12.67   | 0.38  | 1.17  | 319              | 73 205 319 147 160 103 217 320 117 206  | 0.00    | STD/MS |
| 42                                   | Myo-Inositol             | 13.92   | 1.67  | 1.37  | 305              | 73 217 147 305 191 318 204 306 129 265  | 0.00    | STD/MS |
| 43                                   | Maltose                  | 17.69   | 0.51  | 1.43  | 361              | 73 361 204 147 217 103 205 362 129 117  | 0.00    | STD    |
| <i>Nucleotides</i>                   |                          |         |       |       |                  |                                         |         |        |
| 44                                   | Adenine                  | 12.43   | 1.05  | 1.12  | 264              | 264 279 265 96 266 87 174 113 97 125    | 0.00    | MS     |
| 45                                   | Adenosine                | 16.87   | 0.25  | 1.53  | 236              | 73 236 230 217 245 103 147 192 75 74    | 0.00    | MS     |
| 46                                   | Uracil                   | 8.19    | 0.10  | 1.48  | 241              | 73 241 147 99 245 256 255 75 113 242    | 0.00    | STD/MS |
| <i>Etc.</i>                          |                          |         |       |       |                  |                                         |         |        |
| 47                                   | Piperidine               | 4.06    | 1.14  | 1.37  | 142              | 142 156 73 157 59 86 84 143 116 114     | 0.00    | MS     |
| 48                                   | Hydroxylamine            | 5.92    | 0.69  | 1.40  | 133              | 73 133 146 119 147 59 249 130 86 74     | 0.00    | MS     |
| 49                                   | Phosphoric acid          | 7.57    | 1.39  | 1.20  | 299              | 299 73 300 314 301 133 207 193 283 211  | 0.00    | MS     |

**Table S2.** Discriminative metabolites in the four beans from the PLS-DA model of the UHPLC-LTQ-Orbitrap-MS/MS data.

| No.                | Tentative Identification   | Rt (min) | VIP 1 | VIP 2 | [M-H]-    | [M+H]+       | M.W. | MS <sup>n</sup> Fragments (m/z) | p-value | Formula    | RBD  | Error (ppm) | Ref  |
|--------------------|----------------------------|----------|-------|-------|-----------|--------------|------|---------------------------------|---------|------------|------|-------------|------|
| <i>Flavonoid</i>   |                            |          |       |       |           |              |      |                                 |         |            |      |             |      |
| 1                  | Catechin                   | 3.69     | 0.34  | 1.34  | 289.0718  | 291.0866     | 290  | 289>245>203>175                 | 0.00    | C15H14O6   | 9.5  | -0.143      | [42] |
| 2                  | Epicatechin                | 4.20     | 0.26  | 1.07  | 289.0721  | 291.0864     | 290  | 289>245>203>175                 | 0.00    | C15H14O6   | 9.5  | 1.102       | [41] |
| 3                  | Quercetin 3-O-sambubioside | 4.54     | 1.54  | 1.22  | 595.1289  | 619.1291(Na) | 596  | 595>371>327,265>146,138         | 0.00    | C26H28O16  | 13.5 | -2.601      | [43] |
| 4                  | Isoquercetin               | 4.92     | 1.63  | 1.18  | 463.0889  | 465.1028     | 464  | 463>301>178>150                 | 0.00    | C21H20O12  | 12.5 | 1.513       | [44] |
| 5                  | Luteolin-7-O-glucoside     | 5.16     | 0.67  | 1.36  | 447.0941  | 449.1080     | 448  | 447>285>241>213                 | 0.00    | C21H20O11  | 12.5 | 1.869       | [41] |
| 6                  | Apigenin                   | 6.44     | 1.25  | 0.93  | 269.0458  | 271.0601     | 270  | 269>225>197>169                 | 0.00    | C15H10O5   | 11.5 | 0.979       | [41] |
| <i>Isoflavones</i> |                            |          |       |       |           |              |      |                                 |         |            |      |             |      |
| 7                  | Daidzin                    | 4.54     | 1.61  | 1.18  | 415.1029  | 417.1179     | 416  | 415>253>223>195                 | 0.00    | C21H20O9   | 12.5 | -1.314      | [29] |
| 8                  | Glycitin                   | 4.66     | 1.66  | 1.20  | 445.1143  | 447.1284     | 446  | 445>283>268>240                 | 0.00    | C22H22O10  | 12.5 | 0.607       | [29] |
| 9                  | Genistin                   | 5.03     | 1.63  | 1.19  | 431.0978  | 433.1130     | 432  | 431>268>239>211                 | 0.00    | C21H20O10  | 12.5 | -1.229      | [25] |
| 10                 | Glycitein                  | 5.08     | 1.39  | 0.99  | 283.0613  | 285.0757     | 284  | 283>268>240>196                 | 0.00    | C16H12O5   | 11.5 | 0.188       | [25] |
| 11                 | Genistein                  | 5.43     | 1.65  | 1.20  | 269.0458  | 271.0600     | 270  | 269>225>181                     | 0.00    | C15H10O5   | 11.5 | 0.756       | [25] |
| 12                 | Daidzein                   | 5.79     | 1.14  | 0.86  | 253.0508  | 255.0653     | 254  | 253>209>141                     | 0.00    | C15H10O4   | 11.5 | 0.822       | [25] |
| 13                 | Acetyldaidzin              | 5.34     | 1.66  | 1.21  | 457.1135  | 459.1285     | 458  | 457>252>223>194                 | 0.00    | C23H22O10  | 13.5 | -1.072      | [5]  |
| 14                 | Acetylglycitin             | 5.40     | 1.63  | 1.18  | 487.1246  | 489.1393     | 488  | 487>468>267>223                 | 0.00    | C24H24O11  | 13.5 | 0.093       | [5]  |
| 15                 | Acetylgenistin             | 5.80     | 1.63  | 1.18  | 473.1095  | 475.1231     | 474  | 473>268>224>180                 | 0.00    | C23H22O11  | 13.5 | 1.195       | [29] |
| <i>Soyasaponin</i> |                            |          |       |       |           |              |      |                                 |         |            |      |             |      |
| 16                 | Soyasaponin I              | 7.21     | 0.67  | 1.18  | 941.5089  | 943.5255     | 942  | 941>923>879>733                 | 0.00    | C48H78O18  | 10.5 | -2.856      | [25] |
| 17                 | Soyasaponin II             | 7.34     | 1.66  | 1.21  | 911.4991  | 913.5159     | 912  | 911>615,893>849>703             | 0.00    | C47H76O17  | 10.5 | -2.078      | [25] |
| 18                 | Soyasaponin III            | 7.41     | 1.27  | 1.09  | 795.4525  | 797.4667     | 796  | 795>615>457>437                 | 0.00    | C42H68O14  | 9.5  | -1.483      | [29] |
| 19                 | Soyasaponin IV             | 7.49     | 1.62  | 1.17  | 765.4426  | 767.4576     | 766  | 765>615>457,533>437,507         | 0.00    | C41H66O13  | 9.5  | -0.568      | [25] |
| 20                 | Soyasaponin βa             | 7.80     | 1.47  | 1.05  | 1037.5324 | 1039.5496    | 1038 | 1037>937>641>525                | 0.00    | C53H82O20  | 13.5 | -0.306      | [25] |
| 21                 | Soyasaponin γg             | 7.88     | 1.70  | 1.21  | 921.4849  | 923.5006     | 922  | 921>821>641>464                 | 0.00    | C48H74O17  | 12.5 | -0.503      | [20] |
| <i>Lipid</i>       |                            |          |       |       |           |              |      |                                 |         |            |      |             |      |
| 22                 | PI(18:3)                   | 7.66     | 0.73  | 1.11  | 593.2722  | 595.2875     | 594  | 593>315>152,222>78              | 0.00    | C27H47O12P | 5.5  | -1.713      | [45] |
| 23                 | LysoPE(18:3)               | 8.07     | 0.02  | 1.33  | 474.2613  | 476.2766     | 475  | 474>277>233>191                 | 0.00    | C23H42NO7P | 4.5  | -2.725      | [46] |
| 24                 | LysoPE(18:2)               | 8.48     | 1.19  | 1.06  | 476.2778  | 478.2921     | 477  | 476>279>261>243                 | 0.00    | C23H44NO7P | 3.5  | -0.971      | [25] |
| 25                 | LysoPE(16:0)               | 8.80     | 1.07  | 0.77  | 452.2774  | 454.2918     | 453  | 452>255>237>83                  | 0.00    | C21H44NO7P | 1.5  | -1.973      | [25] |
| 26                 | LysoPC(18:2)               | 8.83     | 1.10  | 1.16  | 504.3091  | 520.3389     | 505  | 504>279>261>243                 | 0.00    | C26H50NO7P | 2.5  | -1.722      | [25] |
| 27                 | LysoPE(18:1)               | 9.00     | 0.62  | 1.34  | 478.2941  | 480.3080     | 479  | 478>281>263>245                 | 0.00    | C23H46NO7P | 2.5  | 0.392       | [25] |
| 28                 | LysoPA(18:2)               | 9.00     | 1.06  | 0.86  | 433.2354  | 435.2502     | 434  | 433>153>78                      | 0.00    | C21H39O7P  | 3.5  | -1.646      | [41] |
| 29                 | LysoPC(18:1)               | 9.49     | 0.84  | 0.91  | 506.3245  | 522.3544     | 507  | 506>281>263>95                  | 0.00    | C26H52NO7P | 1.5  | -1.887      | [25] |
| 30                 | Linoleamide                | 10.20    | -     | -     | -         | 280.2622     | 279  | (+)-280>263>245>161             | 0.00    | C18H33NO   | 2.5  | -2.823      | [39] |
| 31                 | Oleamide                   | 10.78    | -     | -     | -         | 282.2773     | 281  | (+)-282>265>247>149             | 0.00    | C18H35NO   | 1.5  | -4.22       | [29] |
| <i>Etc</i>         |                            |          |       |       |           |              |      |                                 |         |            |      |             |      |
| 32                 | γ-Glutamyltyrosine         | 1.39     | 1.69  | 1.22  | 309.1088  | 311.1235     | 310  | 309>291,127>83                  | 0.00    | C14H18N2O6 | 7.5  | -1.228      | [40] |
| 33                 | Glutamylisoleucine         | 2.43     | 0.24  | 0.84  | 259.1307  | 261.1435     | 260  | 259>128>84                      | 0.00    | C11H20N2O5 | 3.5  | -0.482      | [40] |

**Table S3.** Discriminative metabolites in the four beans that were fermented with *Aspergillus oryzae* from the PLS-DA model of the GC-TOF-MS data.

| No.                                  | Tentative identification | RT(min) | VIP 1 | VIP 2 | Unique Mass(m/z) | Mass Fragment pattern(m/z)                 | p-value | ID     |
|--------------------------------------|--------------------------|---------|-------|-------|------------------|--------------------------------------------|---------|--------|
| <i>Amino acids</i>                   |                          |         |       |       |                  |                                            |         |        |
| 1                                    | Alanine                  | 5.76    | 0.19  | 1.17  | 116              | 116 73 75 117 103 74 59 190 100 118        | 0.00    | STD/MS |
| 2                                    | Valine                   | 6.98    | 0.20  | 2.00  | 144              | 144 73 218 145 147 100 75 74 59 146        | 0.00    | STD/MS |
| 3                                    | Leucine                  | 7.53    | 0.08  | 1.95  | 158              | 158 159 102 100 160 232 260 142 86 115     | 0.00    | STD    |
| 4                                    | Isoleucine               | 7.75    | 0.19  | 1.86  | 158              | 158 73 218 159 100 74 160 232 219 59 86    | 0.00    | STD/MS |
| 5                                    | Proline                  | 7.81    | 0.95  | 1.60  | 142              | 142 73 143 147 216 144 74 59 66 72         | 0.00    | STD/MS |
| 6                                    | Glycine                  | 7.89    | 0.48  | 1.31  | 174              | 174 90 86 175 146 100 248 176 130 59       | 0.00    | STD/MS |
| 7                                    | Serine                   | 8.38    | 0.61  | 1.42  | 204              | 73 204 218 147 100 205 75 219 74 188       | 0.00    | STD/MS |
| 8                                    | Threonine                | 8.63    | 1.00  | 1.60  | 117              | 73 117 218 219 101 147 57 75 291 74        | 0.00    | STD/MS |
| 9                                    | β-Alanine                | 8.97    | 0.73  | 0.63  | 174              | 174 248 86 290 175 249 133 59 130 250      | 0.00    | MS     |
| 10                                   | Aspartic acid            | 9.76    | 1.29  | 1.12  | 232              | 73 232 100 147 75 218 74 233 202 188       | 0.00    | STD/MS |
| 11                                   | 5-Oxoproline             | 9.83    | 0.93  | 0.66  | 156              | 156 73 147 75 84 157 230 258 74 158        | 0.00    | MS     |
| 12                                   | Phenylalanine            | 10.02   | 0.47  | 1.93  | 120              | 120 146 75 91 130 121 74 103 77 65         | 0.00    | STD    |
| 13                                   | Glutamic acid            | 10.54   | 2.25  | 1.85  | 246              | 73 246 128 147 75 156 247 84 74 230        | 0.00    | STD    |
| 14                                   | Asparagine               | 10.96   | 1.50  | 1.06  | 116              | 73 116 75 132 231 147 74 141 188 100       | 0.00    | STD/MS |
| 15                                   | Glutamine                | 11.71   | 2.41  | 1.72  | 245              | 156 155 75 245 157 128 131 203 114 145     | 0.00    | STD    |
| 16                                   | Lysine                   | 12.73   | 1.30  | 1.86  | 317              | 73 174 317 156 128 175 230 59 318 147      | 0.00    | MS     |
| 17                                   | Histidine                | 12.77   | 0.97  | 1.73  | 154              | 154 254 155 100 255 156 153 82 356 256     | 0.00    | STD    |
| 18                                   | Tyrosine                 | 12.87   | 1.24  | 1.58  | 218              | 218 219 100 280 220 179 281 132 180 354    | 0.00    | STD/MS |
| 19                                   | Tryptophan               | 14.67   | 0.95  | 1.04  | 202              | 202 73 203 204 291 74 75 218 147 100       | 0.00    | STD/MS |
| <i>Fatty acids and derivatives</i>   |                          |         |       |       |                  |                                            |         |        |
| 20                                   | 1,3-Propanediol          | 5.21    | 1.31  | 0.95  | 115              | 147 73 130 115 66 148 59 177 131 149       | 0.00    | MS     |
| 21                                   | Octanoic acid            | 7.40    | 0.93  | 0.67  | 201              | 201 117 55 129 69 202 70 67 99 143         | 0.00    | MS     |
| 22                                   | Butyric acid             | 8.99    | 0.45  | 1.85  | 233              | 73 233 143 75 117 147 71 234 145 144       | 0.00    | MS     |
| 23                                   | Dodecanoic acid          | 10.73   | 0.90  | 1.23  | 257              | 75 117 129 55 132 57 131 145 257 76        | 0.00    | MS     |
| 24                                   | Palmitic acid            | 13.44   | 2.11  | 1.50  | 173              | 73 117 75 132 313 129 55 145 57 69         | 0.00    | STD/MS |
| 25                                   | Linoleic acid            | 14.47   | 2.23  | 1.64  | 337              | 73 75 55 67 81 117 95 129 69 54            | 0.00    | STD/MS |
| 26                                   | Stearic acid             | 14.61   | 2.25  | 1.60  | 341              | 117 341 145 202 119 356 301 203 95         | 0.00    | STD/MS |
| 27                                   | Oleamide                 | 15.62   | 1.54  | 1.16  | 131              | 75 131 73 144 116 128 55 54 115 145        | 0.00    | MS     |
| 28                                   | Monopalmitin             | 16.50   | 1.70  | 1.25  | 371              | 73 147 371 57 55 129 75 71 117 103         | 0.00    | MS     |
| <i>Organic acids</i>                 |                          |         |       |       |                  |                                            |         |        |
| 29                                   | Lactic acid              | 5.29    | 0.81  | 1.51  | 117              | 73 147 117 191 66 148 75 190 74 59         | 0.00    | STD/MS |
| 30                                   | Acetic acid              | 5.45    | 1.33  | 1.23  | 66               | 73 147 66 148 75 177 205 74 133 149        | 0.00    | MS     |
| 31                                   | Furoic acid              | 5.45    | 0.39  | 1.09  | 125              | 125 95 169 126 184 170 67 96 97 85         | 0.00    | MS     |
| 32                                   | Succinic acid            | 7.90    | 0.32  | 1.57  | 247              | 147 75 247 148 73 55 56 149 129 172        | 0.00    | STD/MS |
| 33                                   | Glyceric acid            | 8.10    | 0.22  | 1.14  | 292              | 73 147 189 103 292 133 75 117 102 74       | 0.00    | STD/MS |
| 34                                   | Phenyllactic acid        | 10.32   | 0.24  | 1.59  | 193              | 193 57 71 85 194 220 55 163 267 70         | 0.00    | MS     |
| 35                                   | Glutaric acid            | 10.42   | 1.94  | 1.62  | 247              | 73 147 75 247 115 231 199 273 74 109       | 0.00    | MS     |
| 36                                   | Urea                     | 7.16    | 0.82  | 0.68  | 171              | 171 147 73 189 99 172 100 74 148 173       | 0.00    | STD/MS |
| <i>Carbohydrates and derivatives</i> |                          |         |       |       |                  |                                            |         |        |
| 37                                   | Glycerol                 | 7.55    | 0.00  | 1.30  | 205              | 73 147 205 117 103 133 206 218 148 204     | 0.00    | MS     |
| 38                                   | Tyrosol                  | 10.17   | 1.23  | 0.94  | 179              | 179 180 103 282 193 283 267 213 213 70 253 | 0.00    | MS     |
| 39                                   | Pinitol                  | 12.22   | 0.54  | 1.57  | 217              | 73 147 217 260 133 191 318 159 247 129     | 0.00    | MS     |
| 40                                   | Fructose                 | 12.48   | 1.61  | 1.60  | 307              | 73 103 217 147 307 74 133 75 117 218       | 0.00    | STD/MS |
| 41                                   | Glucose                  | 12.67   | 1.88  | 1.48  | 205              | 73 205 319 147 160 103 217 320 117 206     | 0.00    | STD/MS |
| 42                                   | Galactose                | 12.67   | 1.83  | 1.46  | 319              | 73 205 319 147 160 103 217 320 117 206     | 0.00    | STD/MS |
| 43                                   | Myo-Inositol             | 13.92   | 2.08  | 1.76  | 305              | 73 217 147 305 191 318 204 306 129 265     | 0.00    | STD/MS |
| 44                                   | Maltose                  | 17.69   | 0.52  | 1.74  | 361              | 73 361 204 147 217 103 205 362 129 117     | 0.00    | STD    |
| <i>Nucleotides</i>                   |                          |         |       |       |                  |                                            |         |        |
| 45                                   | Adenine                  | 12.43   | 1.53  | 1.22  | 264              | 264 279 265 96 266 87 174 113 97 125       | 0.00    | MS     |
| 46                                   | Adenosine                | 16.87   | 1.62  | 1.35  | 236              | 73 236 230 217 245 103 147 192 75 74       | 0.00    | MS     |
| 47                                   | Uracil                   | 8.19    | 0.64  | 1.96  | 241              | 73 241 147 99 245 256 255 75 113 242       | 0.00    | STD/MS |
| <i>Etc.</i>                          |                          |         |       |       |                  |                                            |         |        |
| 48                                   | Piperidine               | 4.06    | 1.42  | 1.31  | 142              | 142 156 73 157 59 86 84 143 116 114        | 0.00    | MS     |
| 49                                   | Hydroxylamine            | 5.92    | 0.44  | 1.23  | 133              | 73 133 146 119 147 59 249 130 86 74        | 0.00    | MS     |
| 50                                   | Phosphoric acid          | 7.57    | 0.80  | 1.43  | 299              | 299 73 300 314 301 133 207 193 283 211     | 0.00    | MS     |

**Table S4.** Discriminative metabolites in the four beans that were fermented with *Aspergillus oryzae* from the PLS-DA model of the UHPLC-LTQ-Orbitrap-MS/MS data.

| No.                | Tentative Identification   | Rt (min) | VIP 1 | VIP 2 | [M-H] <sup>-</sup> | [M+H] <sup>+</sup> | M.W. | MS <sup>n</sup> Fragments (m/z) | p-value | Formula    | RBD  | Error (ppm) | Ref  |
|--------------------|----------------------------|----------|-------|-------|--------------------|--------------------|------|---------------------------------|---------|------------|------|-------------|------|
| <i>Flavonoid</i>   |                            |          |       |       |                    |                    |      |                                 |         |            |      |             |      |
| 1                  | Catechin                   | 3.69     | 0.90  | 0.77  | 289.0718           | 291.0866           | 290  | 289>245>203>175                 | 0.00    | C15H14O6   | 9.5  | -0.143      | [42] |
| 2                  | Epicatechin                | 4.20     | 1.17  | 0.83  | 289.0721           | 291.0864           | 290  | 289>245>203>175                 | 0.00    | C15H14O6   | 9.5  | 1.102       | [41] |
| 3                  | Quercetin 3-O-sambubioside | 4.54     | 2.03  | 1.90  | 595.1289           | 619.1291(Na)       | 596  | 595>371>327,265>146,138         | 0.00    | C26H28O16  | 13.5 | -2.601      | [43] |
| 4                  | Isoquercetin               | 4.92     | 0.37  | 0.79  | 463.0889           | 465.1028           | 464  | 463>301>178>150                 | 0.00    | C21H20O12  | 12.5 | 1.513       | [44] |
| 5                  | Luteolin-7-O-glucoside     | 5.16     | 0.15  | 0.91  | 447.0941           | 449.1080           | 448  | 447>285>241>213                 | 0.00    | C21H20O11  | 12.5 | 1.869       | [41] |
| 6                  | Apigenin                   | 6.44     | 1.35  | 1.50  | 269.0458           | 271.0601           | 270  | 269>225>197>169                 | 0.00    | C15H10O5   | 11.5 | 0.979       | [41] |
| <i>Isoflavones</i> |                            |          |       |       |                    |                    |      |                                 |         |            |      |             |      |
| 7                  | Daidzin                    | 4.54     | 1.54  | 1.37  | 415.1029           | 417.1179           | 416  | 415>253>223>195                 | 0.00    | C21H20O9   | 12.5 | -1.314      | [29] |
| 8                  | Glycitin                   | 4.66     | 1.71  | 1.55  | 445.1143           | 447.1284           | 446  | 445>283>268>240                 | 0.00    | C22H22O10  | 12.5 | 0.607       | [29] |
| 9                  | Genistin                   | 5.03     | 1.60  | 1.45  | 431.0978           | 433.1130           | 432  | 431>268>239>211                 | 0.00    | C21H20O10  | 12.5 | -1.229      | [25] |
| 10                 | Glycitein                  | 5.08     | 1.55  | 1.76  | 283.0613           | 285.0757           | 284  | 283>268>240>196                 | 0.00    | C16H12O5   | 11.5 | 0.188       | [25] |
| 11                 | Genistein                  | 5.43     | 1.79  | 1.92  | 269.0458           | 271.0600           | 270  | 269>225>181                     | 0.00    | C15H10O5   | 11.5 | 0.756       | [25] |
| 12                 | Daidzein                   | 5.79     | 1.31  | 1.47  | 253.0508           | 255.0653           | 254  | 253>209>141                     | 0.00    | C15H10O4   | 11.5 | 0.822       | [25] |
| 13                 | Acetyldaidzin              | 5.34     | 1.67  | 1.56  | 457.1135           | 459.1285           | 458  | 457>252>223>194                 | 0.00    | C23H22O10  | 13.5 | -1.072      | [5]  |
| 14                 | Acetylglcitin              | 5.40     | 1.71  | 1.60  | 487.1246           | 489.1393           | 488  | 487>468>267>223                 | 0.00    | C24H24O11  | 13.5 | 0.093       | [5]  |
| 15                 | Acetylgenistin             | 5.80     | 1.66  | 1.53  | 473.1095           | 475.1231           | 474  | 473>268>224>180                 | 0.00    | C23H22O11  | 13.5 | 1.195       | [29] |
| <i>Soyasaponin</i> |                            |          |       |       |                    |                    |      |                                 |         |            |      |             |      |
| 16                 | Soyasaponin I              | 7.21     | 1.71  | 1.23  | 941.5089           | 943.5255           | 942  | 941>923>879>733                 | 0.00    | C48H78O18  | 10.5 | -2.856      | [25] |
| 17                 | Soyasaponin II             | 7.34     | 1.82  | 1.84  | 911.4991           | 913.5159           | 912  | 911>615,893>849>703             | 0.00    | C47H76O17  | 10.5 | -2.078      | [25] |
| 18                 | Soyasaponin III            | 7.41     | 1.80  | 1.49  | 795.4525           | 797.4667           | 796  | 795>615>457>437                 | 0.00    | C42H68O14  | 9.5  | -1.483      | [29] |
| 19                 | Soyasaponin IV             | 7.49     | 1.84  | 1.88  | 765.4426           | 767.4576           | 766  | 765>615>457,533>437,507         | 0.00    | C41H66O13  | 9.5  | -0.568      | [25] |
| 20                 | Soyasaponin βa             | 7.80     | 1.15  | 1.33  | 1037.5324          | 1039.5496          | 1038 | 1037>937>641>525                | 0.00    | C53H82O20  | 13.5 | -0.306      | [25] |
| 21                 | Soyasaponin γg             | 7.88     | 1.35  | 1.39  | 921.4849           | 923.5006           | 922  | 921>821>641>464                 | 0.00    | C48H74O17  | 12.5 | -0.503      | [20] |
| <i>Lipid</i>       |                            |          |       |       |                    |                    |      |                                 |         |            |      |             |      |
| 22                 | PI(18:3)                   | 7.66     | 0.09  | 1.25  | 593.2722           | 595.2875           | 594  | 593>315>152,222>78              | 0.00    | C27H47O12P | 5.5  | -1.713      | [45] |
| 23                 | LysoPE(18:3)               | 8.07     | 0.34  | 0.80  | 474.2613           | 476.2766           | 475  | 474>277>233>191                 | 0.00    | C23H42NO7P | 4.5  | -2.725      | [46] |
| 24                 | LysoPE(18:2)               | 8.48     | 0.07  | 1.32  | 476.2778           | 478.2921           | 477  | 476>279>261>243                 | 0.00    | C23H44NO7P | 3.5  | -0.971      | [25] |
| 25                 | LysoPE(16:0)               | 8.80     | 1.88  | 1.35  | 452.2774           | 454.2918           | 453  | 452>255>237>83                  | 0.00    | C21H44NO7P | 1.5  | -1.973      | [25] |
| 26                 | LysoPC(18:2)               | 8.83     | 0.47  | 1.24  | 504.3091           | 520.3389           | 505  | 504>279>261>243                 | 0.00    | C26H50NO7P | 2.5  | -1.722      | [25] |
| 27                 | LysoPE(18:1)               | 9.00     | 1.77  | 1.52  | 478.2941           | 480.3080           | 479  | 478>281>263>245                 | 0.00    | C23H46NO7P | 2.5  | 0.392       | [25] |
| 28                 | LysoPA(18:2)               | 9.00     | 1.53  | 1.53  | 433.2354           | 435.2502           | 434  | 433>153>78                      | 0.00    | C21H39O7P  | 3.5  | -1.646      | [41] |
| 29                 | LysoPC(18:1)               | 9.49     | 1.64  | 1.30  | 506.3245           | 522.3544           | 507  | 506>281>263>95                  | 0.00    | C26H52NO7P | 1.5  | -1.887      | [25] |
| 30                 | Linoleamide                | 10.20    | -     | -     | -                  | 280.2622           | 279  | (+ )280>263>245>161             | 0.00    | C18H33NO   | 2.5  | -2.823      | [39] |
| 31                 | Oleamide                   | 10.78    | -     | -     | -                  | 282.2773           | 281  | (+ )282>265>247>149             | 0.00    | C18H35NO   | 1.5  | -4.22       | [29] |
| <i>Etc</i>         |                            |          |       |       |                    |                    |      |                                 |         |            |      |             |      |
| 32                 | γ-Glutamyltyrosine         | 1.39     | 0.77  | 1.07  | 309.1088           | 311.1235           | 310  | 309>291,127>83                  | 0.00    | C14H18N2O6 | 7.5  | -1.228      | [40] |
| 33                 | Glutamylisoleucine         | 2.43     | 0.43  | 1.54  | 259.1307           | 261.1435           | 260  | 259>128>84                      | 0.00    | C11H20N2O5 | 3.5  | -0.482      | [40] |

**Figure S4.** Discriminative non-identification metabolites in the four beans that were fermented with *Aspergillus oryzae* from the PLS-DA model of the UHPLC-LTQ-Orbitrap-MS/MS data.

| No. | Tentative Identification | Rt(min) | VIP 1 | VIP 2 | [M-H] <sup>-</sup> | [M+H] <sup>+</sup> | M.W. | MS <sup>n</sup> Fragments (m/z) | p-value | GM   |      |      |      | GS   |      |      |      | PV   |      |      |      | LP    |      |      |      |
|-----|--------------------------|---------|-------|-------|--------------------|--------------------|------|---------------------------------|---------|------|------|------|------|------|------|------|------|------|------|------|------|-------|------|------|------|
|     |                          |         |       |       |                    |                    |      |                                 |         | 0D   | 1D   | 2D   | 3D   | 0D   | 1D   | 2D   | 3D   | 0D   | 1D   | 2D   | 3D   | 0D    | 1D   | 2D   | 3D   |
| 1   | N.I 1                    | 1.59    | 1.18  | 1.12  | 255.0511           | 257.0677           | 256  | 255>165>135>107                 | 0.00    | 0.14 | 0.22 | 0.27 | 0.12 | 5.58 | 5.32 | 3.17 | 1.17 | 0.00 | 0.01 | 0.00 | 0.00 | 0.00  | 0.00 | 0.00 | 0.00 |
| 2   | N.I 2                    | 2.79    | 2.65  | 1.88  | 295.1773           | 297.1922           | 296  | 295>207>179>136                 | 0.00    | 0.01 | 0.01 | 0.01 | 0.19 | 0.01 | 0.01 | 0.01 | 0.01 | 0.01 | 0.28 | 3.72 | 4.36 | 0.01  | 0.08 | 2.95 | 4.38 |
| 3   | N.I 3                    | 3.36    | 1.79  | 1.92  | 303.0620           | 305.0770           | 304  | 303>259>187>144                 | 0.00    | 1.30 | 1.73 | 1.83 | 1.89 | 2.26 | 2.20 | 2.35 | 2.30 | 0.06 | 0.01 | 0.03 | 0.01 | 0.01  | 0.01 | 0.01 | 0.00 |
| 4   | N.I 4                    | 3.92    | 1.74  | 1.90  | 305.0702           | 307.0930           | 306  | 305>225>181>163                 | 0.00    | 1.26 | 1.35 | 1.85 | 2.01 | 2.21 | 2.06 | 2.47 | 2.62 | 0.02 | 0.01 | 0.00 | 0.00 | 0.05  | 0.07 | 0.03 | 0.00 |
| 5   | N.I 5                    | 4.46    | 0.51  | 1.07  | 225.1133           | 227.1279           | 226  | 225>181>163>121                 | 0.00    | 0.55 | 0.61 | 1.09 | 0.80 | 0.78 | 0.92 | 2.89 | 3.11 | 0.49 | 0.43 | 0.55 | 0.78 | 0.55  | 0.59 | 0.96 | 0.91 |
| 6   | N.I 6                    | 4.55    | 1.63  | 1.23  | 268.0825           | 270.0972           | 269  | 268>136>92                      | 0.00    | 0.12 | 0.12 | 0.12 | 0.12 | 0.12 | 0.52 | 0.12 | 0.12 | 1.42 | 0.12 | 1.93 | 0.12 | 1.43  | 1.49 | 3.15 | 4.98 |
| 7   | N.I 7                    | 4.73    | 1.56  | 1.10  | 796.4222           | 798.4367           | 797  | 796>778>366>322                 | 0.00    | 0.00 | 0.00 | 0.00 | 0.02 | 0.00 | 0.00 | 0.00 | 0.00 | 0.00 | 1.80 | 8.63 | 5.50 | 0.00  | 0.01 | 0.01 | 0.01 |
| 8   | N.I 8                    | 4.80    | 2.42  | 1.72  | 440.2189           | 442.2340           | 441  | 440>180,266>146>128             | 0.00    | 0.03 | 0.03 | 0.03 | 0.01 | 0.00 | 0.00 | 0.00 | 0.00 | 0.00 | 0.32 | 5.87 | 4.22 | 0.03  | 0.06 | 2.78 | 2.61 |
| 9   | N.I 9                    | 4.84    | 1.09  | 1.24  | 493.0997           | 495.1133           | 494  | 493>331>316>287                 | 0.00    | 2.98 | 2.67 | 2.30 | 1.74 | 0.01 | 0.01 | 2.24 | 3.95 | 0.01 | 0.01 | 0.01 | 0.01 | 0.01  | 0.01 | 0.01 | 0.01 |
| 10  | N.I 10                   | 5.16    | 1.17  | 1.04  | 515.1204           | 517.1343           | 516  | 515>253>225>197                 | 0.00    | 0.16 | 0.16 | 0.16 | 0.16 | 3.82 | 2.93 | 4.34 | 1.88 | 0.16 | 0.16 | 0.26 | 0.16 | 1.20  | 0.16 | 0.16 | 0.16 |
| 11  | N.I 11                   | 5.29    | 1.75  | 1.24  | 627.3716           | 629.3873           | 628  | (+629>498>470>453               | 0.00    | 0.00 | 0.00 | 0.00 | 0.08 | 0.00 | 0.00 | 0.00 | 0.00 | 0.00 | 0.00 | 0.09 | 0.07 | 0.00  | 0.07 | 9.80 | 5.88 |
| 12  | N.I 12                   | 5.29    | 1.27  | 1.03  | 787.2656           | 789.2826           | 788  | 787>643>419>293                 | 0.00    | 0.20 | 0.15 | 0.14 | 0.11 | 3.02 | 2.69 | 2.65 | 2.36 | 1.95 | 1.54 | 0.67 | 0.52 | 0.00  | 0.00 | 0.00 | 0.00 |
| 13  | N.I 13                   | 6.10    | 2.03  | 1.44  | 639.4454           | 641.4604           | 640  | 639>299>281>193                 | 0.00    | 0.00 | 0.00 | 0.00 | 0.06 | 0.00 | 0.00 | 0.00 | 0.00 | 0.00 | 0.00 | 0.30 | 1.37 | 0.00  | 0.04 | 6.78 | 7.44 |
| 14  | N.I 14                   | 6.13    | 2.48  | 1.77  | 1013.5070          | 1015.5224          | 1014 | 1013>983>965>473                | 0.00    | 0.02 | 0.02 | 0.03 | 0.06 | 0.05 | 0.02 | 0.02 | 0.03 | 0.00 | 0.00 | 3.07 | 6.13 | 0.00  | 0.02 | 2.21 | 4.32 |
| 15  | N.I 15                   | 6.15    | 0.70  | 0.76  | 1089.5475          | 1091.5656          | 1090 | 1089>1028>878>456               | 0.00    | 0.13 | 6.33 | 3.90 | 3.38 | 0.83 | 0.13 | 0.13 | 0.13 | 0.13 | 0.13 | 0.13 | 0.13 | 0.13  | 0.13 | 0.13 | 0.13 |
| 16  | N.I 16                   | 6.34    | 0.17  | 1.48  | 823.4128           | 847.4096(Na)       | 824  | 823>647>485>439                 | 0.00    | 0.04 | 0.03 | 0.03 | 0.02 | 0.64 | 0.54 | 0.51 | 0.57 | 0.32 | 0.25 | 0.14 | 0.12 | 5.52  | 3.91 | 1.90 | 1.47 |
| 17  | N.I 17                   | 6.51    | 1.80  | 1.28  | 701.4612           | 703.4754           | 702  | 701>389>371>207                 | 0.00    | 0.01 | 0.00 | 0.00 | 0.00 | 0.00 | 0.00 | 0.00 | 0.01 | 0.00 | 0.00 | 0.00 | 0.00 | 0.04  | 0.03 | 7.42 | 8.48 |
| 18  | N.I 18                   | 6.56    | 0.13  | 1.25  | 955.4912           | 957.5050           | 956  | 955>793>613>455                 | 0.00    | 0.99 | 1.15 | 1.11 | 0.85 | 0.36 | 0.32 | 0.30 | 0.33 | 0.02 | 0.02 | 0.01 | 0.01 | 4.52  | 3.27 | 1.47 | 1.27 |
| 19  | N.I 19                   | 6.61    | 1.55  | 1.47  | 523.2568           | 525.2707           | 524  | 523>417>311>172                 | 0.00    | 0.00 | 0.08 | 2.51 | 1.81 | 0.00 | 0.44 | 1.23 | 1.66 | 0.00 | 0.22 | 2.05 | 1.26 | 0.00  | 0.52 | 2.48 | 1.75 |
| 20  | N.I 20                   | 6.67    | 0.13  | 1.47  | 809.4332           | 811.4482           | 810  | 809>629>567>471                 | 0.00    | 0.27 | 0.33 | 0.29 | 0.23 | 0.29 | 0.25 | 0.21 | 0.23 | 0.07 | 0.05 | 0.03 | 0.03 | 5.98  | 4.48 | 1.86 | 1.41 |
| 21  | N.I 21                   | 6.77    | 0.08  | 1.07  | 1041.5380          | 1043.5531          | 1042 | 1041>1011>993>654,822,896       | 0.00    | 0.26 | 0.26 | 0.26 | 0.26 | 0.26 | 0.26 | 0.26 | 0.26 | 0.26 | 0.26 | 0.26 | 0.26 | 10.54 | 0.26 | 0.26 | 1.82 |
| 22  | N.I 22                   | 6.99    | 2.65  | 1.89  | 1055.5519          | 1057.5682          | 1056 | 1055>1025>1007>668              | 0.00    | 0.08 | 0.07 | 0.07 | 0.09 | 0.03 | 0.03 | 0.02 | 0.03 | 0.00 | 0.10 | 3.72 | 3.51 | 0.05  | 0.11 | 4.34 | 3.72 |
| 23  | N.I 23                   | 7.09    | 0.73  | 0.56  | 957.5074           | 959.5222           | 958  | 957>525>439>406                 | 0.00    | 1.02 | 1.02 | 0.99 | 0.85 | 1.00 | 0.89 | 0.88 | 0.92 | 3.18 | 2.71 | 1.38 | 1.12 | 0.02  | 0.01 | 0.01 | 0.01 |
| 24  | N.I 24                   | 8.27    | 1.97  | 1.86  | 571.2869           | 573.3028           | 572  | 571>255>237>81                  | 0.00    | 1.19 | 1.37 | 1.40 | 1.31 | 1.88 | 1.71 | 1.87 | 1.75 | 0.48 | 0.44 | 0.28 | 0.30 | 0.56  | 0.65 | 0.50 | 0.31 |
| 25  | N.I 25                   | 8.78    | 0.57  | 1.25  | 564.3307           | 566.3402           | 565  | 564>504>279>261                 | 0.00    | 0.82 | 1.01 | 1.33 | 1.56 | 1.12 | 1.15 | 1.22 | 1.33 | 0.42 | 0.80 | 0.62 | 0.54 | 0.77  | 0.95 | 1.41 | 0.95 |
| 26  | N.I 26                   | 9.86    | 2.38  | 1.70  | 1038.6676          | 1040.6849          | 1039 | 1038>1020>1002>818              | 0.00    | 0.00 | 0.00 | 0.01 | 0.41 | 0.00 | 0.00 | 0.00 | 0.01 | 0.00 | 0.07 | 2.30 | 4.75 | 0.00  | 0.28 | 1.73 | 6.43 |
| 27  | N.I 27                   | 9.92    | 2.47  | 1.77  | 350.2699           | 352.2841           | 351  | 350>306>235                     | 0.00    | 0.09 | 0.03 | 0.06 | 0.12 | 0.10 | 0.10 | 0.12 | 0.10 | 0.01 | 0.07 | 2.53 | 4.88 | 0.02  | 0.04 | 2.14 | 5.59 |
| 28  | N.I 28                   | 10.09   | 2.51  | 1.78  | 1052.6835          | 1054.7003          | 1053 | 1052>1034>1016>818              | 0.00    | 0.00 | 0.00 | 0.01 | 0.55 | 0.00 | 0.00 | 0.00 | 0.01 | 0.00 | 0.18 | 2.46 | 3.68 | 0.00  | 0.86 | 2.42 | 5.80 |
| 29  | N.I 29                   | 10.46   | 2.31  | 1.71  | 1006.6434          | 1008.6568          | 1007 | 1006>988>664>452                | 0.00    | 0.03 | 0.00 | 0.01 | 0.26 | 0.01 | 0.00 | 0.00 | 0.01 | 0.02 | 1.64 | 2.83 | 2.89 | 0.01  | 3.11 | 2.36 | 2.81 |
| 30  | N.I 30                   | 10.79   | 2.01  | 1.59  | 1020.6588          | 1022.6730          | 1021 | 1020>1002>678,984>452,762       | 0.00    | 0.03 | 0.00 | 0.01 | 0.12 | 0.01 | 0.00 | 0.00 | 0.01 | 0.02 | 2.06 | 2.83 | 2.34 | 0.01  | 3.79 | 2.30 | 2.46 |



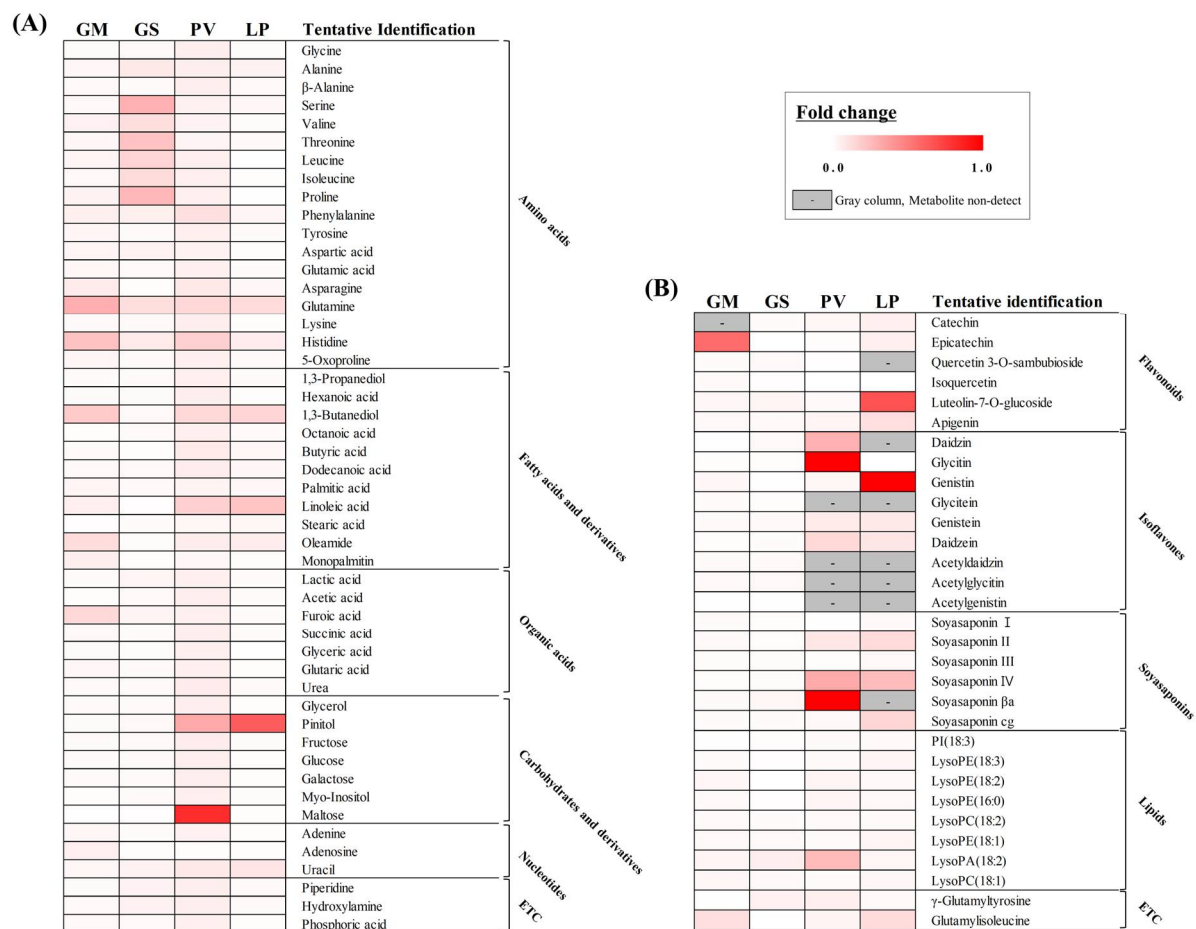

**Figure S5.** Heat map of the standard deviations of the relative contents of each metabolite in four different beans prior to fermentation analyzed through GC-TOF-MS (A) and UHPLC-LTQ-Orbitrap-MS/MS (B) analyses depicted in Figure 2A, B. Each square represents the magnitude of the standard deviations as a color ranging from white(0) to red(1). GM: *G. max*, GS: *G. soja*, PV: *P. vulgaris*, LP: *L. purpureus*

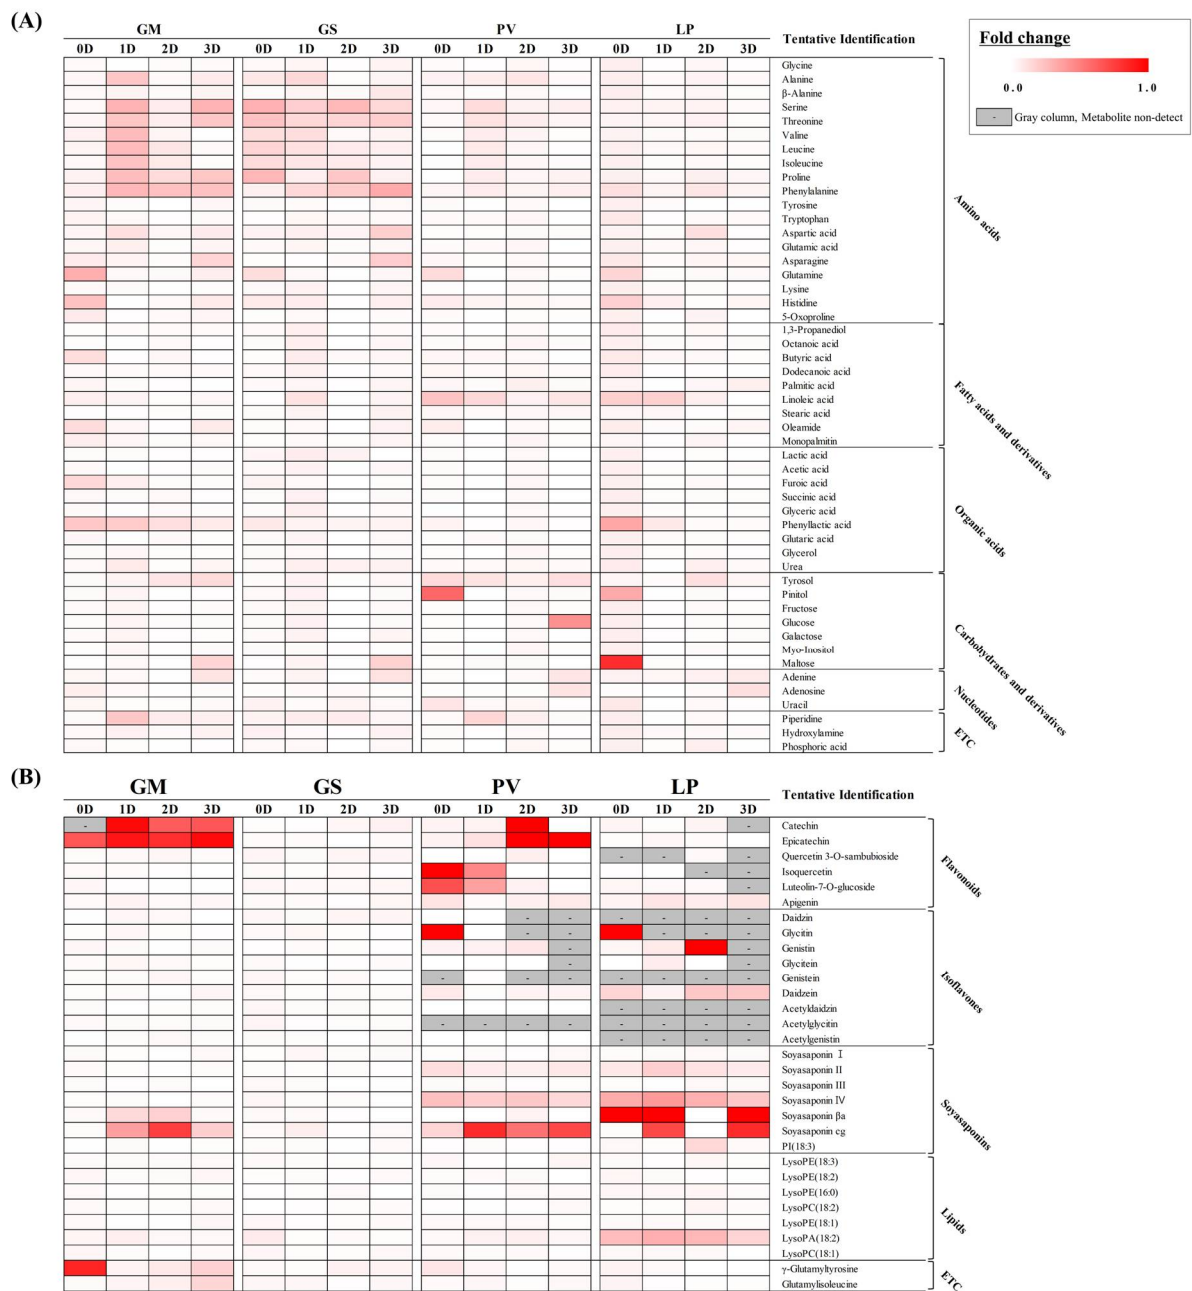

**Figure S6.** Heat map of the standard deviations of the relative contents of each metabolite in four different bean fermentations analyzed through GC-TOF-MS (A) and UHPLC-LTQ-Orbitrap-MS/MS (B) analyses depicted in Figure 2A, B. Each square represents the magnitude of the standard deviations as a color ranging from white(0) to red(1). GM: *G. max*, GS: *G. soja*, PV: *P. vulgaris*, LP: *L. purpureus*
